# Supplementary material
Source: PubMed Central journal article supplement (PMC4205607)
Supplement: pnas.201413656SI.pdf [file pnas.201413656SI.pdf]

# Supporting Information

Schneider et al. 10.1073/pnas.1413656111

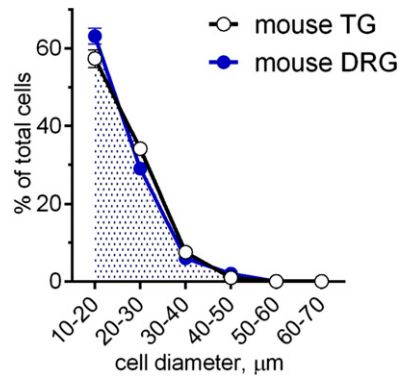

**Fig. S1.** The majority of mouse trigeminal ganglia (TG) and dorsal root ganglia (DRG) neurons have small-diameter soma size. Data are presented as mean  $\pm$  SEM from >1,500 cells from >14 sections for each tissue.

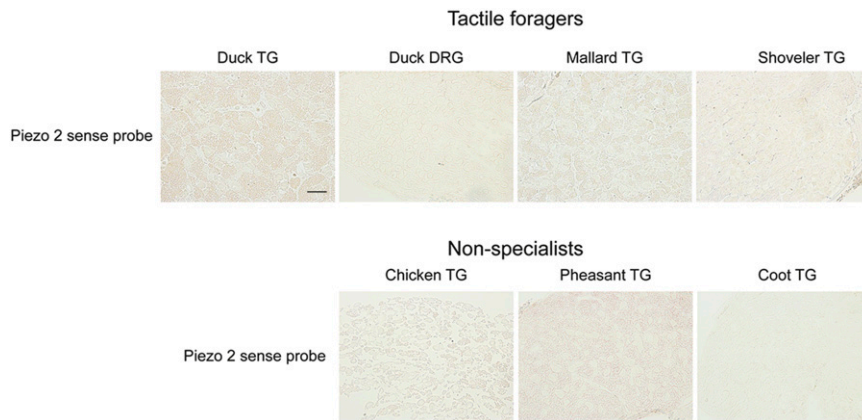

**Fig. S2.** Control RNA in situ hybridization using Piezo2 sense probe. (Scale bar, 100 μm.)

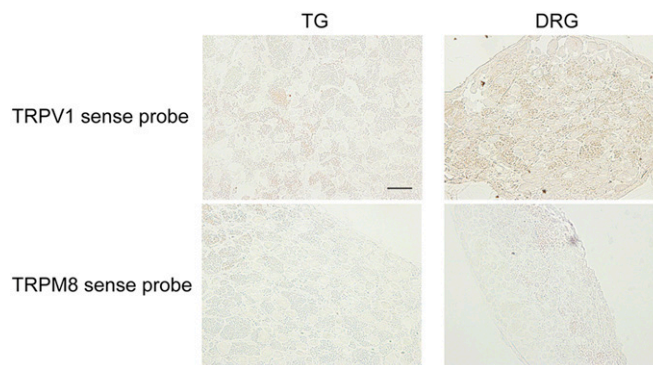

**Fig. S3.** Control RNA in situ hybridization using TRPV1 and TRPM8 sense probes in duck TG and DRG. (Scale bar, 100 μm.)
